# Supplementary material for: Profiles of Cytokines Secreted by ARPE-19 Cells Exposed to Light and Incubated with Anti-VEGF Antibody
Source: MDPI journal article supplement (doi:10.3390/biomedicines9101333), 2021-09-27
Supplement: s1 [file s1]

**Supplementary Table S1. Comparisons of cytokine levels in culture supernatant of ARPE-19 cells incubated with aflibercept at various concentrations in the dark**

| <b>A</b>     |                               |  |  |  |
|--------------|-------------------------------|--|--|--|
| 4 groups     | <i>p</i> value                |  |  |  |
| IL-6         | 0.060                         |  |  |  |
| IL-8         | 0.051                         |  |  |  |
| <b>IL-12</b> | <b>2.05 x 10<sup>-6</sup></b> |  |  |  |
| IL-17A       | 0.196                         |  |  |  |
| bFGF         | 0.119                         |  |  |  |
| MCP-1        | 0.418                         |  |  |  |
| <b>VEGF</b>  | <b>4.13 x 10<sup>-5</sup></b> |  |  |  |

  

| <b>B</b>   |           |                         |                         |                         |
|------------|-----------|-------------------------|-------------------------|-------------------------|
| IL-12      | 7.81 µg-A | 31.3 µg-A               | 0.125 mg-A              | 0.50 mg-A               |
| 7.81 µg-A  | —         | 3.87 x 10 <sup>-7</sup> | 3.87 x 10 <sup>-7</sup> | 3.87 x 10 <sup>-7</sup> |
| 31.3 µg-A  | **        | —                       | 1.000                   | 1.000                   |
| 0.125 mg-A | **        |                         | —                       | 1.000                   |
| 0.50 mg-A  | **        |                         |                         | —                       |

  

| <b>C</b>   |           |                         |                         |                         |
|------------|-----------|-------------------------|-------------------------|-------------------------|
| VEGF       | 7.81 µg-A | 31.3 µg-A               | 0.125 mg-A              | 0.50 mg-A               |
| 7.81 µg-A  | —         | 1.03 x 10 <sup>-4</sup> | 8.61 x 10 <sup>-5</sup> | 8.12 x 10 <sup>-5</sup> |
| 31.3 µg-A  | **        | —                       | 0.571                   | 0.381                   |
| 0.125 mg-A | **        |                         | —                       | 0.967                   |
| 0.50 mg-A  | **        |                         |                         | —                       |

ARPE-19 cells were cultured with 7.81 µg/mL, 31.3 µg/mL, 0.125 mg/mL or 0.50 mg/mL of aflibercept in the dark. Four groups consisted of aflibercept-exposed cultures at indicated concentrations. (A) cytokine levels among the 4 groups were compared by non-repeated measures ANOVA. (B and C) *P* values in all pairwise comparisons of IL-12 and VEGF-A levels among aflibercept-exposed cultures were obtained by Tukey-Kramer test. *n* = 3 in each group. A: aflibercept, mg: mg/mL, µg: µg/mL.

**Supplementary Table S2. Comparisons of cytokine levels in culture supernatant of ARPE-19 cells incubated with aflibercept at various concentrations under light irradiation**

| <b>A</b> |                |
|----------|----------------|
| 4 groups | <i>p</i> value |
| IL-6     | <b>0.015</b>   |
| IL-8     | <b>0.040</b>   |
| IL-12    | 0.479          |
| IL-17A   | 0.734          |
| bFGF     | 0.154          |
| MCP-1    | <b>0.019</b>   |
| VEGF     | <b>0.046</b>   |

  

| <b>B</b>   |           |              |            |              |
|------------|-----------|--------------|------------|--------------|
| IL-6       | 7.81 µg-A | 31.3 µg-A    | 0.125 mg-A | 0.50 mg-A    |
| 7.81 µg-A  | —         | <b>0.013</b> | 0.163      | <b>0.037</b> |
| 31.3 µg-A  | *         | —            | 0.095      | 0.489        |
| 0.125 mg-A |           |              | —          | 0.412        |
| 0.50 mg-A  | *         |              |            | —            |

  

| <b>C</b>   |           |              |            |           |
|------------|-----------|--------------|------------|-----------|
| IL-8       | 7.81 µg-A | 31.3 µg-A    | 0.125 mg-A | 0.50 mg-A |
| 7.81 µg-A  | —         | <b>0.042</b> | 0.117      | 0.058     |
| 31.3 µg-A  | *         | —            | 0.650      | 0.974     |
| 0.125 mg-A |           |              | —          | 0.849     |
| 0.50 mg-A  |           |              |            | —         |

  

| <b>D</b>   |           |              |            |              |
|------------|-----------|--------------|------------|--------------|
| MCP-1      | 7.81 µg-A | 31.3 µg-A    | 0.125 mg-A | 0.50 mg-A    |
| 7.81 µg-A  | —         | <b>0.035</b> | 0.085      | <b>0.018</b> |
| 31.3 µg-A  | *         | —            | 0.693      | 0.774        |
| 0.125 mg-A |           |              | —          | 0.292        |
| 0.50 mg-A  | *         |              |            | —            |

  

| <b>E</b>   |           |           |                               |           |
|------------|-----------|-----------|-------------------------------|-----------|
| VEGF       | 7.81 µg-A | 31.3 µg-A | 0.125 mg-A                    | 0.50 mg-A |
| 7.81 µg-A  | —         | 0.148     | <b>4.97 x 10<sup>-2</sup></b> | 0.061     |
| 31.3 µg-A  |           | —         | 0.625                         | 0.752     |
| 0.125 mg-A | *         |           | —                             | 0.993     |
| 0.50 mg-A  |           |           |                               | —         |

ARPE-19 cells were cultured with 7.81 µg/mL, 31.3 µg/mL, 0.125 mg/mL or 0.50 mg/mL of aflibercept under light irradiation. Four groups were composed of aflibercept-exposed cultures at indicated concentrations. **(A)** Cytokine levels among the 4 groups were compared. **(B to E)** All pairwise comparisons of IL-6, IL-8, MCP-1 and VEGF-A levels among aflibercept-exposed cultures were performed.  $n = 3$  in each group.

**Supplementary Table S3. Comparisons of cytokine levels in culture supernatant of ARPE-19 cells incubated with ranibizumab at various concentrations in the dark**

| A          |                         |           |           |                         |            |           |                         |           |                         |
|------------|-------------------------|-----------|-----------|-------------------------|------------|-----------|-------------------------|-----------|-------------------------|
| 4 groups   | <i>p</i> value          |           |           |                         |            |           |                         |           |                         |
| IL-6       | 0.002                   |           |           |                         |            |           |                         |           |                         |
| IL-8       | 0.013                   |           |           |                         |            |           |                         |           |                         |
| IL-12      | 1.08 x 10 <sup>-4</sup> |           |           |                         |            |           |                         |           |                         |
| IL-17A     | 0.239                   |           |           |                         |            |           |                         |           |                         |
| bFGF       | 0.021                   |           |           |                         |            |           |                         |           |                         |
| MCP-1      | 0.005                   |           |           |                         |            |           |                         |           |                         |
| VEGF       | 8.22 x 10 <sup>-5</sup> |           |           |                         |            |           |                         |           |                         |
| B          |                         |           |           |                         |            |           |                         |           |                         |
| IL-6       | 1.95 µg-R               | 7.81 µg-R | 31.3 µg-R | 0.125 mg-R              | MCP-1      | 1.95 µg-R | 7.81 µg-R               | 31.3 µg-R | 0.125 mg-R              |
| 1.95 µg-R  | —                       | 0.006     | 0.007     | 0.001                   | 1.95 µg-R  | —         | 0.007                   | 0.011     | 0.008                   |
| 7.81 µg-R  | **                      | —         | 0.990     | 0.076                   | 7.81 µg-R  | **        | —                       | 0.828     | 0.996                   |
| 31.3 µg-R  | **                      |           | —         | 0.059                   | 31.3 µg-R  | *         |                         | —         | 0.914                   |
| 0.125 mg-R | **                      |           |           | —                       | 0.125 mg-R | **        |                         |           | —                       |
| C          |                         |           |           |                         |            |           |                         |           |                         |
| IL-8       | 1.95 µg-R               | 7.81 µg-R | 31.3 µg-R | 0.125 mg-R              | VEGF       | 1.95 µg-R | 7.81 µg-R               | 31.3 µg-R | 0.125 mg-R              |
| 1.95 µg-R  | —                       | 0.702     | 0.143     | 0.012                   | 1.95 µg-R  | —         | 3.51 x 10 <sup>-4</sup> | 0.050     | 0.004                   |
| 7.81 µg-R  |                         | —         | 0.413     | 0.025                   | 7.81 µg-R  | **        | —                       | 0.001     | 8.59 x 10 <sup>-5</sup> |
| 31.3 µg-R  |                         |           | —         | 0.097                   | 31.3 µg-R  |           | **                      | —         | 0.001                   |
| 0.125 mg-R | *                       | *         |           | —                       | 0.125 mg-R | **        | **                      | **        | —                       |
| D          |                         |           |           |                         |            |           |                         |           |                         |
| IL-12      | 1.95 µg-R               | 7.81 µg-R | 31.3 µg-R | 0.125 mg-R              |            |           |                         |           |                         |
| 1.95 µg-R  | —                       | 0.021     | 0.102     | 2.71 x 10 <sup>-4</sup> |            |           |                         |           |                         |
| 7.81 µg-R  | *                       | —         | 0.004     | 1.14 x 10 <sup>-4</sup> |            |           |                         |           |                         |
| 31.3 µg-R  |                         | **        | —         | 0.001                   |            |           |                         |           |                         |
| 0.125 mg-R | **                      | **        | **        | —                       |            |           |                         |           |                         |

ARPE-19 cells were cultured with 1.95 µg/mL, 7.81 µg/mL, 31.3 µg/mL or 0.125 mg/mL of ranibizumab in the dark. Four groups consisted of ranibizumab-exposed cultures at indicated concentrations. (A) Cytokine levels among the 4 groups were compared. (B to G) All pairwise comparisons of IL-6, IL-8, IL-12, bFGF, MCP-1 and VEGF-A levels among ranibizumab-exposed cultures were performed. *n* = 3 in each group. R: ranibizumab.

**Supplementary Table S4. Comparisons of cytokine levels in culture supernatant of ARPE-19 cells incubated with ranibizumab at various concentrations under light irradiation**

**A**

| 4 groups     | <i>p</i> value |
|--------------|----------------|
| IL-6         | 0.490          |
| IL-8         | 0.325          |
| <b>IL-12</b> | <b>0.005</b>   |
| IL-17A       | 0.415          |
| bFGF         | 0.632          |
| MCP-1        | 0.105          |
| <b>VEGF</b>  | <b>0.012</b>   |

**B**

| IL-12      | 7.81 µg-A | 31.3 µg-A | 0.125 mg-A   | 0.50 mg-A    |
|------------|-----------|-----------|--------------|--------------|
| 7.81 µg-A  | —         | 0.739     | <b>0.045</b> | <b>0.005</b> |
| 31.3 µg-A  |           | —         | 0.106        | <b>0.009</b> |
| 0.125 mg-A | *         |           | —            | 0.080        |
| 0.50 mg-A  | **        | **        |              | —            |

**C**

| VEGF       | 7.81 µg-A | 31.3 µg-A | 0.125 mg-A   | 0.50 mg-A    |
|------------|-----------|-----------|--------------|--------------|
| 7.81 µg-A  | —         | 0.809     | <b>0.047</b> | <b>0.014</b> |
| 31.3 µg-A  |           | —         | 0.099        | <b>0.025</b> |
| 0.125 mg-A | *         |           | —            | 0.416        |
| 0.50 mg-A  | *         | *         |              | —            |

ARPE-19 cells were cultured with 1.95 µg/mL, 7.81 µg/mL, 31.3 µg/mL or 0.125 mg/mL of ranibizumab under light irradiation. Four groups were composed of ranibizumab-exposed cultures at indicated concentrations. (A) Cytokine levels among the 4 groups were compared. (B and C) All pairwise comparisons of IL-12 and VEGF-A levels among ranibizumab-exposed cultures were performed. *n* = 3 in each group.
